# Supplementary material for: Age-related differences in the respiratory microbiota of chickens
Source: PLoS One. 2017 Nov 22;12(11):e0188455. doi: 10.1371/journal.pone.0188455 (PMC5699826; doi:10.1371/journal.pone.0188455)
Supplement: S5 Table — (XLSX) [file pone.0188455.s005.xlsx]

## Sheet: Nasal_Subsampled_OTUs.indicator
S5 Table. Significantly indicative OTUs for specific age groups in nasal samples.
OTU	Taxonomy	Age group	Indicator value	p-value
OTU 009	Enterobacteriaceae	2 days old	71.0821	0.044
OTU 011	Staphylococcus	2 days old	72.7991	0.042
OTU 033	02d06	2 days old	88.4437	0.024
OTU 047	Comamonadaceae	2 days old	91.3706	<0.001
OTU 052	Cupriavidus	2 days old	79.956	0.032
OTU 065	Delftia	2 days old	99.457	0.002
OTU 069	Oxalobacteraceae	2 days old	95.5799	0.002
OTU 127	Oxalobacteraceae	2 days old	80	0.014
OTU 141	Sphingobacteriales	2 days old	91.5016	0.004
OTU 149	Mycobacterium gordonae	2 days old	79.9555	0.018
OTU 157	Pseudomonas umsongensis	2 days old	78.8669	0.026
OTU 308	Cupriavidus	2 days old	60	0.048
OTU 684	Brevundimonas diminuta	2 days old	60	0.044
OTU 007	Lactobacillus reuteri	3 weeks old	83.4118	0.026
OTU 021	Lachnospiraceae	3 weeks old	80.9476	0.016
OTU 025	Faecalibacterium prausnitzii	3 weeks old	73.4727	0.028
OTU 029	Lachnospiraceae	3 weeks old	86.9755	0.014
OTU 053	Ruminococcus	3 weeks old	70.524	0.024
OTU 060	Blautia	3 weeks old	65.3202	0.048
OTU 090	Coprococcus	3 weeks old	89.5326	0.012
OTU 113	Ruminococcus	3 weeks old	73.7887	0.014
OTU 144	Ruminococcus	3 weeks old	68.9083	0.034
OTU 163	cc_115	3 weeks old	81.9053	0.02
OTU 230	Lactococcus	3 weeks old	100	0.008
OTU 264	Dorea	3 weeks old	90.2013	0.004
OTU 272	Coprobacillus	3 weeks old	86.4629	0.008
OTU 314	Ruminococcus torques	3 weeks old	96.5805	0.022
OTU 387	Bifidobacterium	3 weeks old	92.6207	0.01
OTU 408	Blautia producta	3 weeks old	91.0499	0.012
OTU 414	Candidatus_Arthromitus	3 weeks old	76.8	0.032
OTU 012	Gammaproteobacteria	30 months old	85.6354	0.03
OTU 015	Lactobacillus mucosae	30 months old	99.7137	0.01
OTU 017	Bacteria	30 months old	78.1754	0.032
OTU 023	Jeotgalicoccus psychrophilus	30 months old	91.272	0.008
OTU 026	Staphylococcus equorum	30 months old	98.0316	0.014
OTU 030	Turicibacter	30 months old	98.5598	0.012
OTU 034	Facklamia	30 months old	97.3515	0.006
OTU 035	Actinomycetales	30 months old	97.0772	0.008
OTU 038	Enterococcus cecorum	30 months old	98.0892	0.004
OTU 043	Corynebacterium	30 months old	94.4087	0.004
OTU 044	Moraxellaceae	30 months old	99.5925	0.006
OTU 048	Acinetobacter lwoffii	30 months old	89.9906	0.004
OTU 050	Corynebacterium stationis	30 months old	86.9246	0.006
OTU 055	Fusobacteriales	30 months old	83.3333	0.012
OTU 057	Pseudomonadaceae	30 months old	64.4567	0.036
OTU 070	SMB53	30 months old	85.2064	0.016
OTU 072	Micrococcaceae	30 months old	83.0193	0.028
OTU 080	Macrococcus caseolyticus	30 months old	66.6667	0.048
OTU 084	Aerococcus	30 months old	81.2549	0.014
OTU 087	Bacillales	30 months old	77.6495	0.038
OTU 091	Psychrobacter	30 months old	100	0.004
OTU 093	Brachybacterium	30 months old	95.207	0.006
OTU 097	Trichococcus	30 months old	91.5346	0.008
OTU 099	Phascolarctobacterium	30 months old	83.3333	0.012
OTU 101	Bacteroidales	30 months old	99.4236	0.002
OTU 107	Peptostreptococcaceae	30 months old	89.0318	0.028
OTU 108	Aeromonadaceae	30 months old	99.8584	0.002
OTU 122	Bacteroides	30 months old	85.9064	0.006
OTU 123	Fusobacterium	30 months old	93.4341	0.01
OTU 125	Anaerobiospirillum	30 months old	81.4143	0.014
OTU 133	Moraxellaceae	30 months old	66.6667	0.046
OTU 139	Brevibacterium	30 months old	83.4343	0.014
OTU 147	Fusobacteriaceae	30 months old	66.6667	0.03
OTU 158	Planococcaceae	30 months old	79.4041	0.016
OTU 160	Dietziaceae	30 months old	100	0.004
OTU 166	Alcaligenaceae	30 months old	94.4272	0.006
OTU 169	Deinococcus	30 months old	82.0416	0.016
OTU 176	Psychrobacter pulmonis	30 months old	99.9145	0.004
OTU 188	Jeotgalicoccus	30 months old	83.3333	0.014
OTU 190	Arthrobacter	30 months old	84.578	0.01
OTU 192	Coriobacteriaceae	30 months old	93.2704	0.01
OTU 195	Sporosarcina	30 months old	91.6355	0.012
OTU 197	Planococcaceae	30 months old	79.2011	0.018
OTU 198	Pseudomonadales	30 months old	64.7249	0.046
OTU 207	Leucobacter	30 months old	100	0.004
OTU 208	Aerococcaceae	30 months old	66.6667	0.044
OTU 217	Parabacteroides	30 months old	83.3333	0.022
OTU 238	Brachybacterium	30 months old	80.1282	0.016
OTU 243	Prevotellaceae	30 months old	66.6667	0.042
OTU 244	Bacillaceae	30 months old	78.6163	0.018
OTU 250	Dietzia	30 months old	87.8285	0.008
OTU 265	Nocardiopsaceae	30 months old	72.5655	0.032
OTU 269	Lactobacillus agilis	30 months old	83.3333	0.022
OTU 270	Paraprevotellaceae	30 months old	66.6667	0.034
OTU 271	Planomicrobium	30 months old	98.2575	0.002
OTU 282	S24-7	30 months old	66.6667	0.04
OTU 291	Bulleidia	30 months old	66.6667	0.044
OTU 296	Sphaerochaeta	30 months old	83.3333	0.012
OTU 299	Rummeliibacillus	30 months old	74.166	0.012
OTU 343	Eubacterium	30 months old	66.6667	0.038
OTU 345	Erysipelothrix	30 months old	83.3333	0.02
OTU 353	Fusobacteriaceae	30 months old	66.6667	0.042
OTU 355	Desulfovibrio	30 months old	66.6667	0.04
OTU 363	Myroides	30 months old	66.6667	0.042
OTU 364	Slackia	30 months old	100	0.004
OTU 368	Idiomarinaceae	30 months old	66.6667	0.048
OTU 376	Kurthia gibsonii	30 months old	83.3333	0.01
OTU 377	Sporosarcina aquimarina	30 months old	83.3333	0.01
OTU 378	Yaniella	30 months old	66.6667	0.048
OTU 379	Desulfovibrionaceae	30 months old	66.6667	0.04
OTU 381	Bacteroides barnesiae	30 months old	66.6667	0.036
OTU 384	Synergistaceae	30 months old	83.3333	0.022
OTU 386	Paraprevotellaceae	30 months old	83.3333	0.014
OTU 409	Actinomyces	30 months old	64.1026	0.036
OTU 412	Barnesiellaceae	30 months old	66.6667	0.036
OTU 417	RFN20	30 months old	66.6667	0.04
OTU 427	Deinococcaceae	30 months old	66.6667	0.028
OTU 429	Mucispirillum schaedleri	30 months old	83.3333	0.01
OTU 435	Collinsella	30 months old	100	0.004
OTU 447	Kocuria	30 months old	83.3333	0.01
OTU 452	Paracoccus aminovorans	30 months old	80.7823	0.012
OTU 510	Tissierellaceae	30 months old	66.6667	0.04
OTU 534	Succinivibrionaceae	30 months old	66.6667	0.04
OTU 559	Akkermansia	30 months old	66.6667	0.04
OTU 687	Prevotella	30 months old	66.6667	0.038
OTU 719	Bacteroidaceae	30 months old	66.6667	0.038
